# Supplementary material for: Genipin-Induced Inhibition of Uncoupling Protein-2 Sensitizes Drug-Resistant Cancer Cells to Cytotoxic Agents
Source: PubMed Central journal article supplement (PMC2953501; doi:10.1371/journal.pone.0013289), 2010-10-13

# Supplemental Figure 1

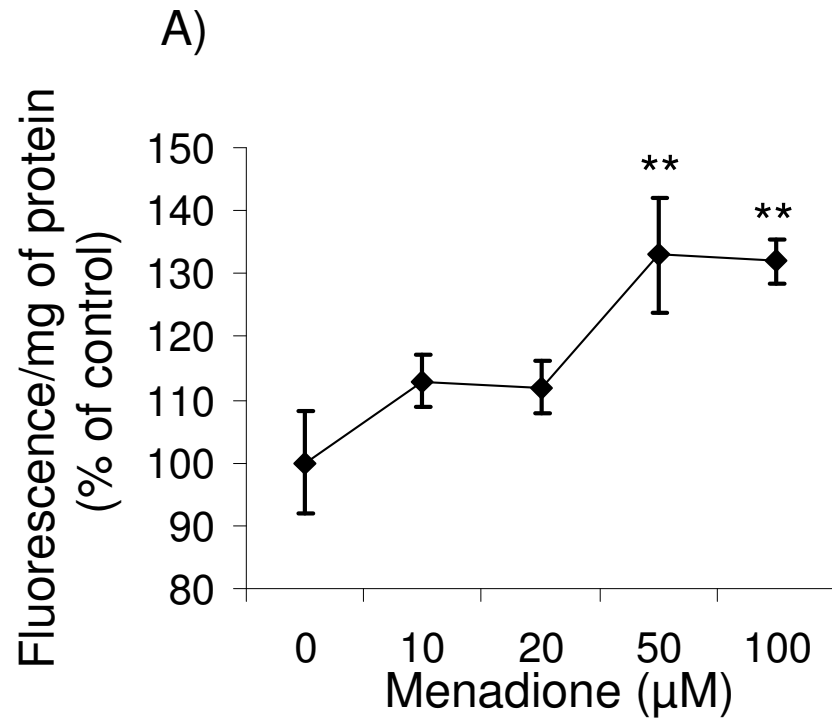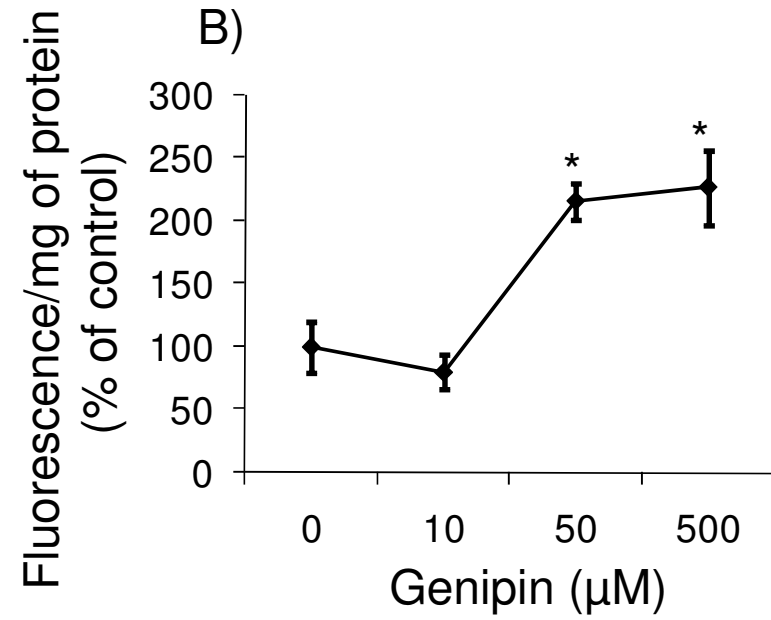

Supplement: pone.0013289.s001.pdf [file pone.0013289.s001.pdf]
